# Supplementary material for: Possible Role of Metformin as an Immune Modulator in the Tumor Microenvironment of Ovarian Cancer
Source: PubMed Central journal article supplement (PMC7830067; doi:10.3390/ijms22020867), 2021-01-16
Supplement: ijms-22-00867-s001.pdf [file ijms-22-00867-s001.pdf]

| <u>Study Title</u>                                                                                                      | <u>Study Identifier</u> | <u>Trial Phase</u> | <u>Conditions</u>                                                                                               | <u>Interventions</u>                                                                      | <u>Primary Outcome</u>               | <u>Host Institution</u>                                          | <u>Status</u>      |
|-------------------------------------------------------------------------------------------------------------------------|-------------------------|--------------------|-----------------------------------------------------------------------------------------------------------------|-------------------------------------------------------------------------------------------|--------------------------------------|------------------------------------------------------------------|--------------------|
| Study of Metformin With Carboplatin/Paclitaxel Chemotherapy in Patients With Advanced Ovarian Cancer (OVMET)            | NCT02312661             | Phase 1            | Epithelial Ovarian Carcinoma (Stage 3+)                                                                         | Paclitaxel/Carboplatin ± Metformin                                                        | ADEs within 2 years                  | University Medical Center Groningen                              | Completed          |
| A Randomized WOO Study of Novel Therapeutic Agents in Women Triaged to Primary Surgery for EOC (IMPACT)                 | NCT03378297             | Phase 1            | Ovarian, Fallopian Tube or Primary Peritoneal Cancer (Stage 3+)                                                 | Metformin, Acetylsalicylic Acid, Olaparib or Letrozole prior to primary debulking surgery | Biomarker Expression within 3 months | Haukeland University Hospital                                    | Recruiting         |
| Study of Paclitaxel, Carboplatin and Oral Metformin in the Treatment of Advanced Stage Ovarian Carcinoma                | NCT02437812             | Phase 2            | Epithelial Ovarian, Fallopian Tube or Primary Peritoneal Carcinoma (Stage 2+)                                   | Paclitaxel/Carboplatin ± Metformin                                                        | PFS up to 1 year                     | Gynecologic Oncology Associates and University of North Carolina | Recruiting         |
| Metformin and Chemotherapy in Treating Patients With Stage III-IV Ovarian, Fallopian Tube, or Primary Peritoneal Cancer | NCT02122185             | Phase 2            | Ovarian (Multiple Subtypes*), Fallopian Tube, Germ Cell or Primary Peritoneal Carcinoma (Recurrent or Stage 3+) | Paclitaxel/Carboplatin ± Metformin or Docetaxel/Carboplatin ± Metformin                   | PFS up to 2 years                    | University of Chicago                                            | Recruiting         |
| Evaluation of Metformin, Targeting Cancer Stem Cells for Prevention of Relapse in Gynecologic Patients                  | NCT01579812             | Phase 2            | Epithelial Ovarian, Fallopian Tube or Primary Peritoneal Carcinoma (Stage 2+)                                   | Paclitaxel/Carboplatin ± Metformin                                                        | RFS up to 18 months                  | University of Michigan Rogel Cancer Center                       | Completed**        |
| Study of the Safety, Tolerability and Efficacy of Metabolic Combination Treatments on Cancer                            | NCT02201381             | Phase 3            | Multiple Cancers including Ovarian Cancer                                                                       | SOC ± Metformin, Atorvastatin, Doxycycline, or Mebendazole                                | OS up to 5 years                     | Health Clinics Limited                                           | Not Yet Recruiting |

**Supplementary Table 1. Ongoing and Completed Trials including Ovarian Cancer Using Metformin in a Treatment Arm.**

Status of each clinical trial is current as of January 2021, according to data from the NIH U.S. National Library of Medicine accessed at [clinicaltrials.gov](https://clinicaltrials.gov).

**Abbreviations:** ADEs – adverse drug events, PFS – progression free survival, RFS – recurrence free survival, OS – overall survival, SOC – standard of care.

\*Subtypes include clear cell, endometrioid, mixed epithelial, serous, undifferentiated; study also included Brenner Tumor, malignant ascites and malignant pleural effusion

\*\*Results for NCT01579812 have been reported and are available at PMID: 32369446 (Brown et al., JCI Insight 2020)
